# Supplementary material
Source: Springer Nature journal article supplement (https://www.springermedizin.de/resource/supplementary/12943_2010_708_MOESM8_ESM.pdf/9554628)

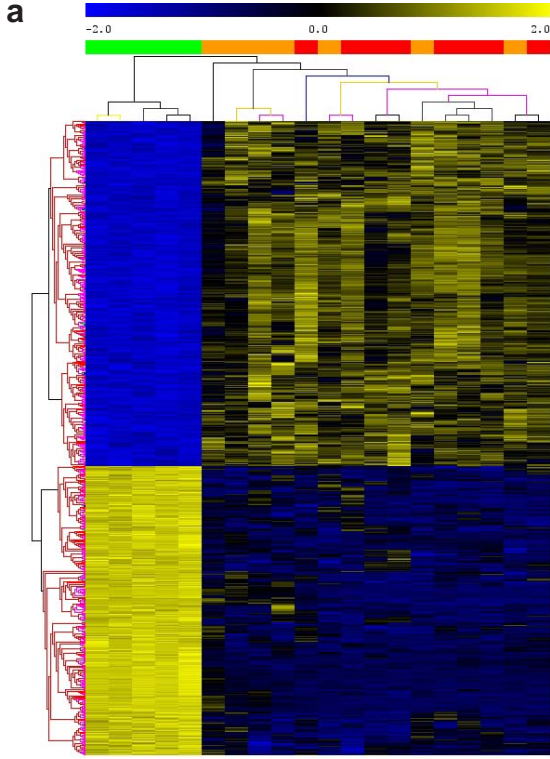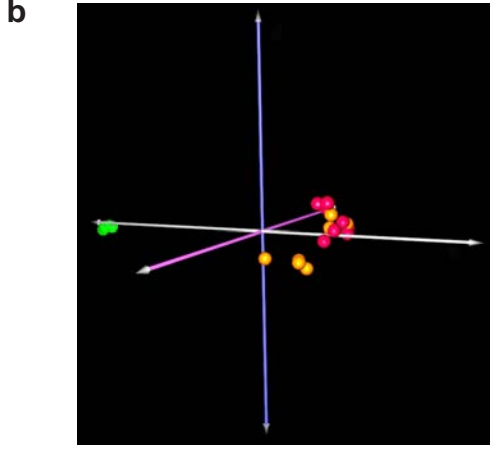

- Normal skin
- Trp53<sup>EC</sup>
- Rb<sup>EC</sup>; Trp53<sup>EC</sup>

**c**

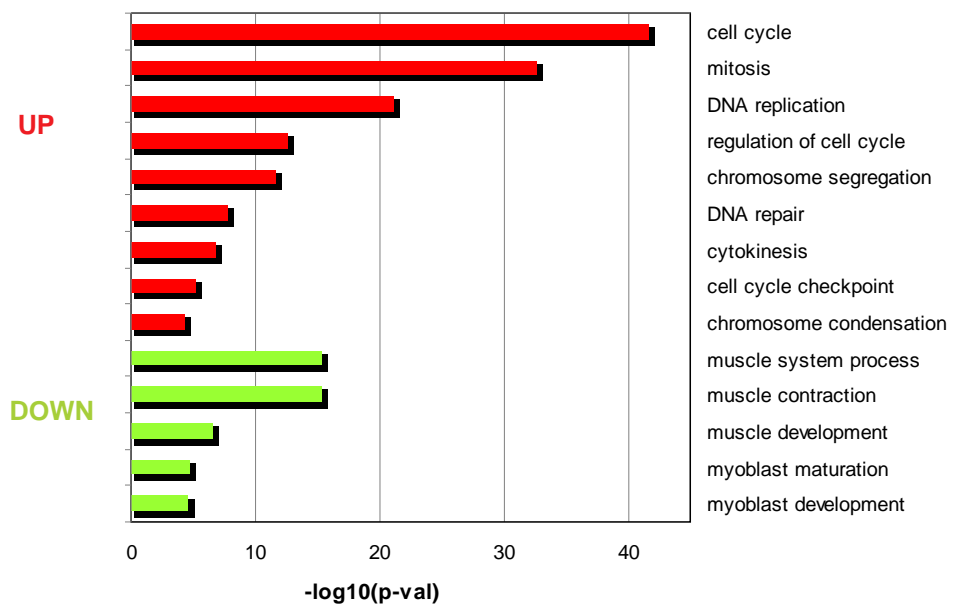

Supplement: MOESM8 [file 9554628]
